# Supplementary material for: Differences in surface chemistry of iron oxide nanoparticles result in different routes of internalization
Source: publisher site journal article supplement (doi:10.3762/bjnano.12.22), 2021-03-23
Supplement: Additional file 1 [file 2190-4286-12-22-S1.pdf]

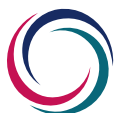

## Supporting Information

for

### **Differences in surface chemistry of iron oxide nanoparticles result in different routes of internalization**

Barbora Svitkova, Vlasta Zavisova, Veronika Nemethova, Martina Koneracka, Miroslava Kretova, Filip Razga, Monika Ursinyova and Alena Gabelova

*Beilstein J. Nanotechnol.* **2021**, *12*, 270–281. [doi:10.3762/bjnano.12.22](https://doi.org/10.3762/bjnano.12.22)

### **Expression of clathrin and caveolin, cytotoxicity of MNPs and endocytic inhibitors, time-lap imaging and fluorescent microscopy of A549 cells**

## Expression of the key proteins involved in endocytosis in A549 cells

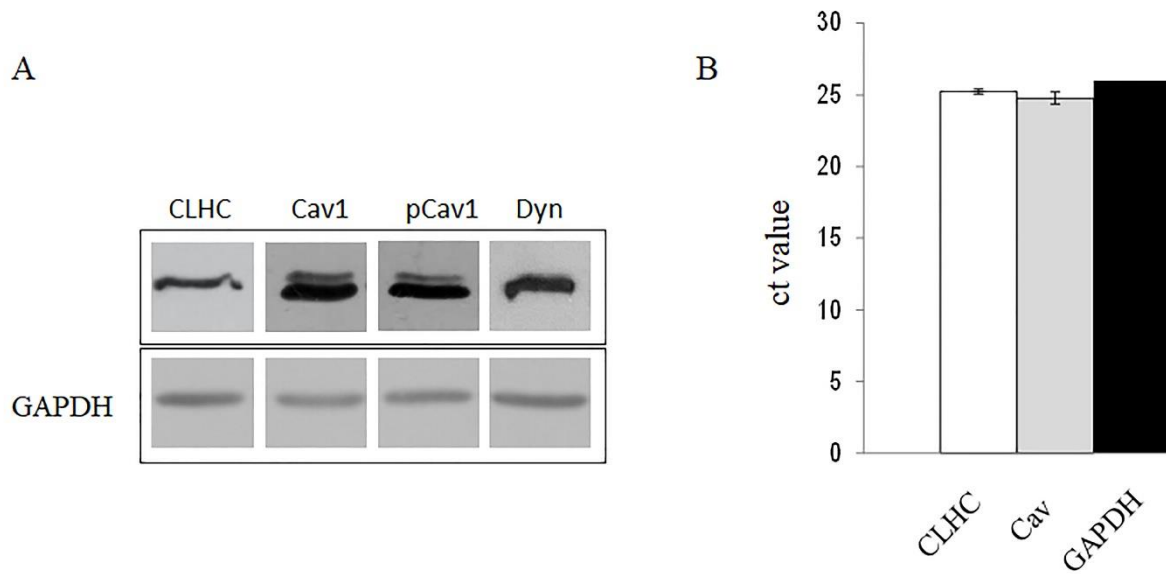

**Figure S1:** Expression of dynamin, clathrin, and caveolin in A549 cells. A – Western blotting, B – RT-PCR. Dyn – dynamin ( $M_w = 100$  kDa), CLHC – clathrin heavy chain ( $M_w = 190$  kDa), Cav1 – caveolin 1 ( $M_w = 21, 24$  kDa), pCav1 – phospho-caveolin 1 ( $M_w = 23, 25$  kDa), and GAPDH – glyceraldehyde 3-phosphate dehydrogenase ( $M_w = 36$  kDa, housekeeping gene/protein).

## Real-time phase-contrast images of A549 cells after exposure to surface-modified MNPs and endocytic inhibitors

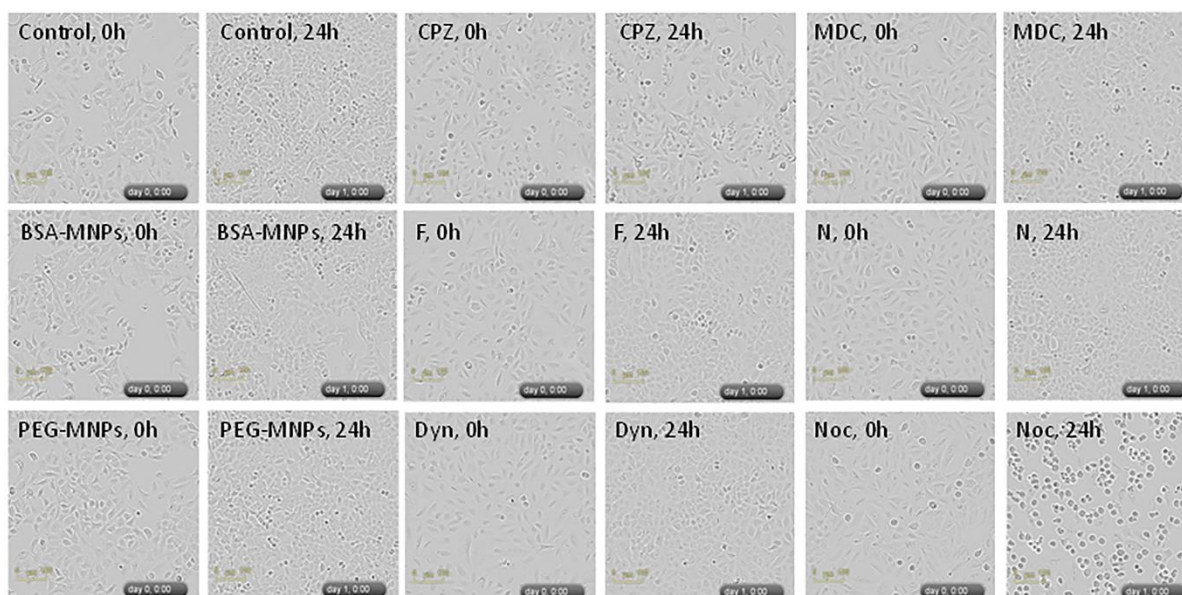

**Figure S2:** After treatment with MNPs (1 h) and endocytic inhibitors (2 h), cells were post-cultivated in fresh medium and screened for 24 h using the IncuCyte ZOOM™ Live Content Imaging System (Essen BioScience). CPZ – chlorpromazine, MDC – monodansylcadaverine, F – filipin, N – nystatin, Dyn – dynasore, and Noc – nocodazole. Scale bars represent 100  $\mu\text{m}$ .

**The effect of endocytic inhibitors on the internalization of positive controls:  
transferrin and cholera toxin**

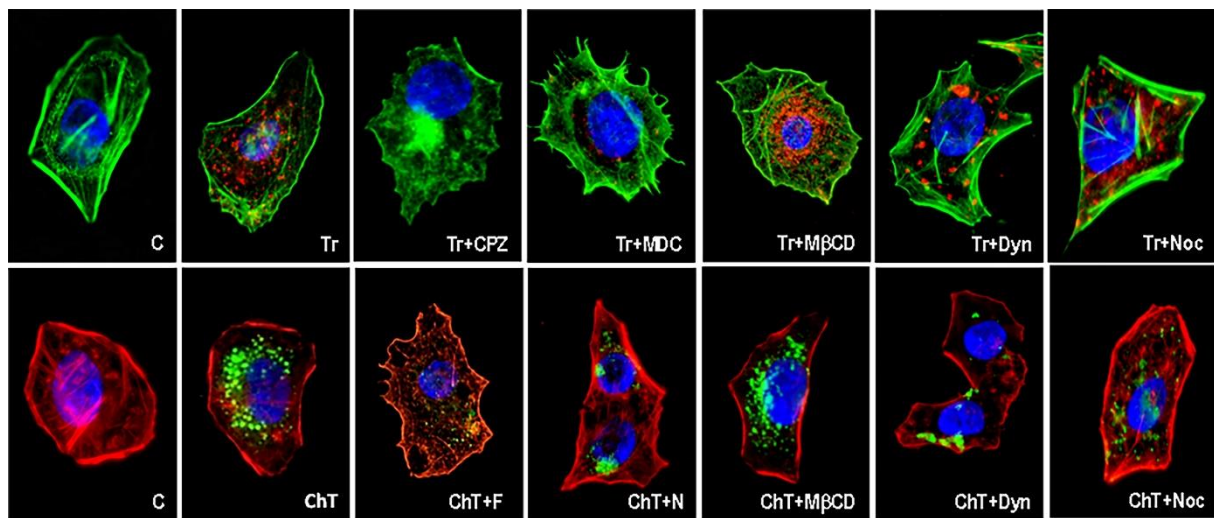

**Figure S3:** The effect of endocytic inhibitors on the internalization of positive controls: Tr (Alexa Fluor 594–Transferrin conjugate), positive control for clathrin-mediated endocytosis (CME), ChT (cholera Toxin B subunit–FITC conjugate), positive control for caveolin-mediated endocytosis (Cav1). Inhibitors: C – control, CPZ – chlorpromazine and MDC – monodansylcadaverine (CME), F – filipin, N – nystatin, M $\beta$ CD – methyl- $\beta$ -cyclodextrin (CavME/lipid raft), Dyn – dynasore, and Noc – nocodazole (inhibitor of microtubules). Tr – red, ChT – green, nucleus – blue (DAPI, 4,6-diamide-2-phenylindole), F-Actin – Alexa Fluor Phalloidin 488 (green) or Alexa Fluor Phalloidin 546 (red); magnification 630 $\times$ .

**Stable expression of green fluorescent protein tagged with clathrin light chain (CLLCb-GFP)**

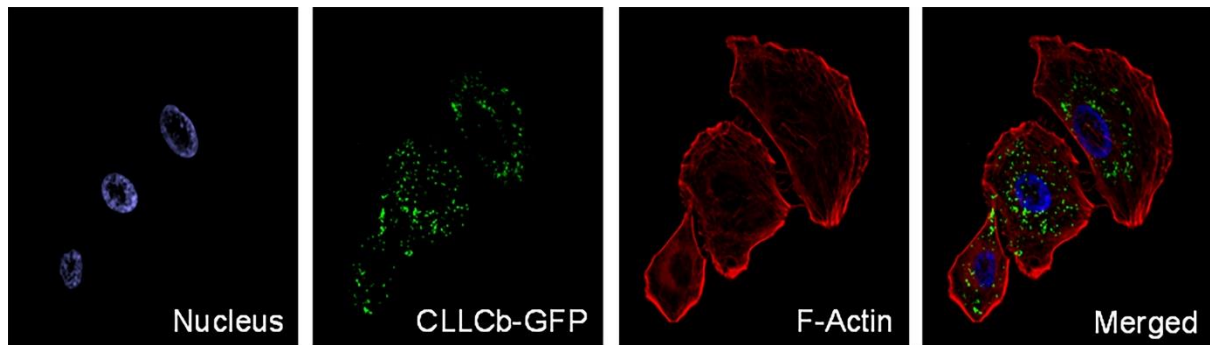

**Figure S4:** Stable expression of green fluorescent protein (GFP)-tagged clathrin light chain (CLLCb-GFP) in A549 cells. Blue – nucleus (DAPI, 4,6-diamide-2-phenylindole), green – CLLCb-GFP, and red – F-actin (Alexa Fluor Phalloidin 546); magnification 630 $\times$ .

# Cytotoxicity of surface-modified MNPs assessed by MTT assay

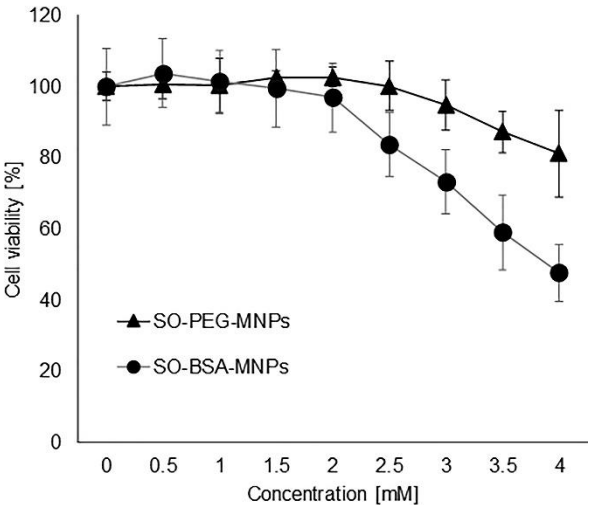

**Figure S5:** A549 cells were exposed to different concentrations of BSA-SO-MNPs and PEG-SO-MNPs for 1 h. Data are given as mean values  $\pm$  SD from at least two independent experiments with eight parallel measurements.

# Cytotoxicity of endocytic inhibitors assessed by MTT assay

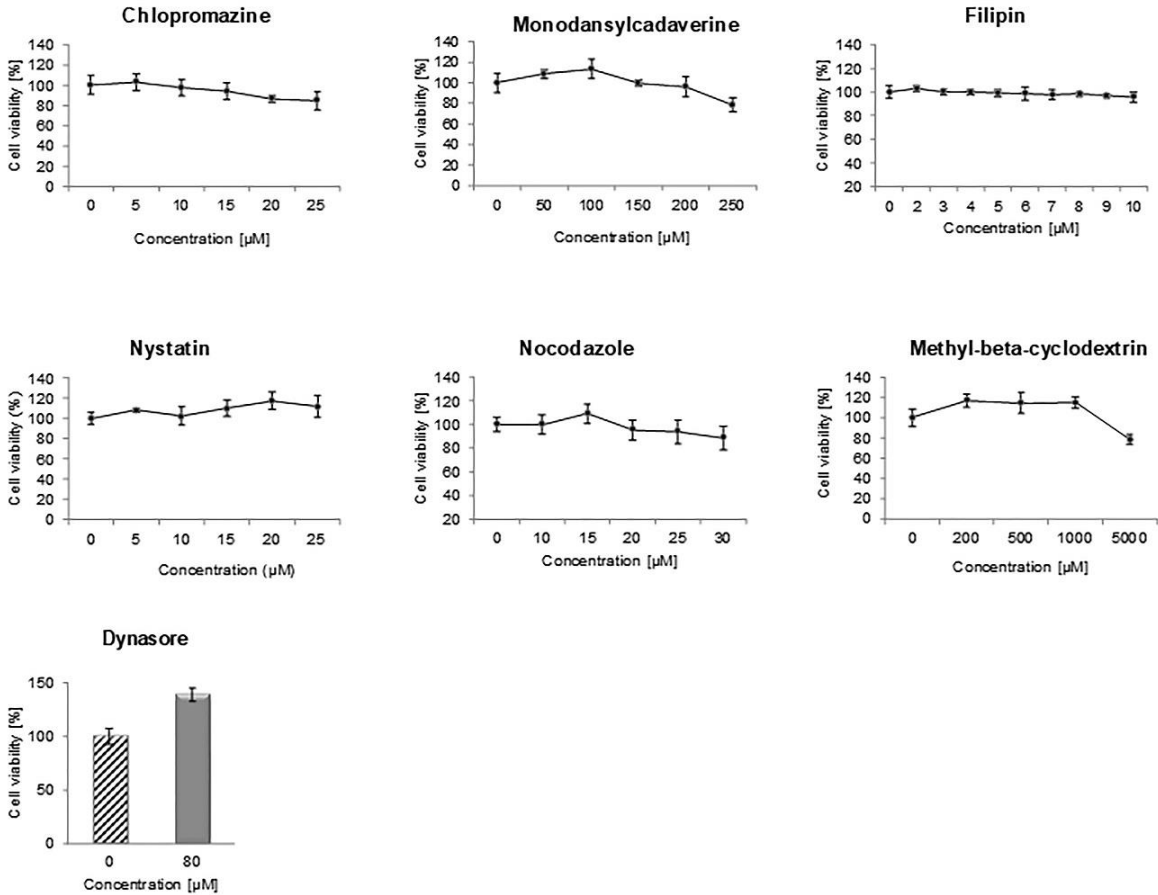

**Figure S6:** A549 cells were treated with various inhibitors of endocytosis for 2 h. Data are given as mean values  $\pm$  SD from at least two independent experiments with eight parallel measurements.
